# Supplementary material
Source: publisher site journal article supplement (https://www.dovepress.com/article/469958)
Supplement: Supplementary file 1 [file get_supplementary_file.php]

# Supplementary Material

# Title: The Danish Centre for Strategic Research in Type 2 Diabetes (DD2) Project Cohort and Biobank—A Cohort Profile Update

| **Content** | **Page** |
| --- | --- |
| Genotyping and imputation and examples of nested studies in DD2 | 2 |
| Supplementary Table 1. Definitions of covariates from the core data. | 3-6 |
| Supplementary Table 2. Hospital diagnosis codes and definitions of comorbidities recorded in the Danish National Patient Registry. | 7-9 |
| Supplementary Table 3. ATC codes and definitions of medication use in the Danish National Prescription Registry. | 10-11 |
| Supplementary Table 4. ATC codes and definitions of glucose-lowering drug use in the Danish National Prescription Registry. | 12 |
| Supplementary Table 5. NPU codes used to identify laboratory tests in the Nationwide Register of Laboratory Results for Research. | 13-14 |
| Supplementary Table 6. Hospital diagnosis codes and definitions of outcomes in the Danish National Patient Registry. | 15 |
| Supplementary Table 7. Proportion of missingness for covariates. | 16-17 |
| Supplementary Table 8. Incidence rates and risks of mortality and cardiovascular outcomes in individuals after DD2 enrollment. | 18 |
| References | 19 |

**Genotyping and imputation**

A total of 10,162 individuals were genotyped with the Global Screening Array-24 v2.0 or v3.0 chip (Illumina, San Diego, CA, USA). Genotypes were called using the GenCall algorithm in GenomeStudio software (Illumina). For quality control, individuals were excluded for sex mismatch, relatedness closer than the 3rd degree, >5% missing genotypes, as well as outliers of heterozygosity and non-European ethnicity, thus leaving 9,422 individuals in the data set. Variants were excluded if they were monomorphic, had a call rate below 98%, showed significant differential frequency between chip version 2.0 and 3.0, or had a Hardy-Weinberg equilibrium p-value <10-5, thus leaving 509,896 genotyped variants.

Imputation was performed locally with Haplotype Reference Consortium (HRC)1 and 1000 Genomes Phase32 data as reference panels, and with the Michigan imputation server 1.5.7 pipeline with Minimac4 v.1.0.2 imputation3 and Eagle v.2.4 phasing.4 The imputed HRC and 1000 Genomes data sets comprised 37,913,586 (13,978,847 with r2 above 0.8) and 49,008,224 (9,965,440 with r2 above 0.8) variants, respectively.

**Examples of nested studies in the DD2 project**

As part of the International Diabetic Neuropathy Consortium (IDNC) Study, a follow-up questionnaire was sent to approximately 6,700 DD2 participants in 2016.5-8 The questionnaire repeated questions initially asked at enrollment, focusing on lifestyle behaviors and body composition, as well as new questions related to neuropathy symptoms, quality of life, mental health, and sleep quality.8 Completed or ongoing intervention studies using the DD2 cohort include the InterWalk project,9-11 the specialist supervised individualized multifactorial treatment of new clinically diagnosed type 2 diabetes in general practice (IDA) trial,12,13 and the Digital Individualized and Collaborative Treatment of T2DM in General Practice Based on Decision Aid – A Randomized Controlled Trial (DICTA-RCT).14

**Supplementary Table 1.** Definitions of covariates from the core data.

| **Covariate** | **Definition** | **Codes** | **Database/registry** |
| --- | --- | --- | --- |
| Region of residence at time of enrollment | Residence in one of the five Danish Regions at time of DD2 enrollment. |  | Civil Registration System |
| Civil status | Categorized as single, married, divorced, widow/widower. |  | Civil Registration System |
| Presence of type 2 diabetes in immediate family | The respondent answered the question “Are there any people in your close family with known type 2 diabetes?” with “at least one family member with type 2 diabetes,” categorized as yes/no/unknown. Family members included mother, father, grandmothers, grandfathers, siblings, and children. |  | DD2 |
| Height | Height registered at DD2 enrollment, recorded in the Danish Diabetes Database of Adults (DDDA), and recorded in the 2016 follow-up questionnaire.  All records (age ≥18 years) were used if the difference between the minimum and maximum height was <10 cm. The mean of all eligible heights was used, because height is assumed to be stable over time. |  | DD2, DDDA, and follow-up questionnaire |
| Weight | Weight registered at DD2 enrollment, recorded in the Danish Diabetes Database of Adults (DDDA), and also recorded in the 2016 follow-up questionnaire. The record on the day closest to DD2 enrollment (maximum 6 months after enrollment) was used. |  | DD2, DDDA, and follow-up questionnaire |
| Body mass index (BMI) | Based on the above height and weight measures. Categorized according to WHO standard categories (kg/m2) as:   - <18.5 - 18.5–24.9 - 25–29.9 - 30–34.9 - >35 |  | DD2, DDDA, and follow-up questionnaire |
| Hip circumference | Registered at DD2 enrollment. Measured by a healthcare provider in centimeters. |  | DD2 |
| Waist circumference | Registered at DD2 enrollment. Measured by a healthcare provider in centimeters. |  | DD2 |
| Weight at 20 years of age | Registered at DD2 enrollment. Self-reported weight at age 20 years. Measured in kilograms. |  | DD2 |
| Maximum lifetime weight | Registered at DD2 enrollment. Self-reported maximum lifetime weight before DD2 enrollment. Measured in kilograms. |  | DD2 |
| Resting heart rate | Registered at DD2 enrollment. Measured in beats/minute.  Measured at the end of the registration interview, after the patient rested in a chair for 10–15 minutes. |  | DD2 |
| Systolic/diastolic blood pressure | Measured in mmHg.  Systolic/diastolic blood pressure measurement recorded in DDDA. The record on the day closest to DD2 enrollment (maximum 6 months after enrollment) was used. |  | DDDA |
| Weekly alcohol consumption | At the time of questionnaire development, Danish health authorities recommended consumption of less than 14 units of alcohol per week for women and 21 units per week for men. Thus, women enrolled in DD2 could answer ≤/>14 units per week and men could answer ≤/>21units per week. |  | DD2 |
| Days per week with >30 min of physical activity | Question asked on the baseline questionnaire: “What is the number of days per week with a minimum of 30 minutes of physical activity?” Potential answers: no days, 1 day, 2 days, 3 days, 4, days, 5 days, 6 days, all days. |  | DD2 |
| Leisure-time sport activities | Question asked on the baseline questionnaire: “Do you perform physical activity in your spare time, or do you participate in other sports activities?”, with possible answers of yes/no. |  | DD2 |
| Level of leisure-time physical activity during the past year | Question asked on the baseline questionnaire about physical activity during leisure time within the past year (Saltin–Grimby Physical Activity Level Scale), categorized as:   - Vigorous physical activity: hard physical training and competitive sports several times per week - Moderate physical activity: leisure sports, heavy garden work, or similar activity at least 4 hours per week - Some physical activity: walking, cycling, or other light exercise at least 4 hours per week - Sedentary: reading, watching television, or other sedentary activity |  | DD2 |
| Smoking status | Smoking status recorded on the day closest to DD2 enrollment. Categorized as:   - Current smokers, occasionally - Current smokers, daily - Former smokers - Never smokers |  | DDDA |
| First indication of diabetes | First occurrence of an indication of diabetes:   - Hospital diagnosis of T2DM - Glucose-lowering drug prescription - Date of DD2 enrollment - First HbA1c ≥48 mmol/mol (in the Laboratory Information System or DDDA) - First record in DDDA | ICD-10: DE10-DE14, O24 (except DO24.4), DG62.3, DH36.0, DN08.3, DG590, DH289, DH334B, T383, DM142  ATC: A10  Codes to identify HbA1c values in the Laboratory Information System are provided below. | Danish National Patient Registry, Danish National Prescription Registry, Laboratory Results for Research, DDDA, DD2 database |
| Diabetes duration | Years from first indication of diabetes (defined above) to DD2 enrollment. |  |  |
| Highest educational level | The information was retrieved in the subset of the cohort enrolled from 2010 until 2021 from data available on Statistics Denmark’s research servers.  Highest achieved educational level at enrollment was grouped according to the International Standard Classification of Education (ISCED) into categories of low (ISCED level 1–2), medium (ISCED level 3–4), or high (ISCED level 5+) for participants born in 1960 or before, and low (ISCED level 1–2), medium (ISCED level 3–5), or high (ISCED level 6+) for participants patients born in 1960 or later. Categorized as:   - Low: primary and lower secondary school - Medium: upper secondary school and short cycle tertiary school - High: above short-cycle tertiary school |  | Danish Education Register |
| Birth weight | In grams. |  | Danish National Archive |
| Birth length | In centimeters |  | Danish National Archive |
| Twin | Yes/no |  | Danish National Archive |
| Born at term | Yes/no (if no, how many weeks early?). |  | Danish National Archive |
| Contact with podiatrist at DD2 enrollment | Recorded in the Danish National Podiatrist Registry. The record on the day closest to DD2 enrollment (maximum 6 months after enrollment) was used. |  | Danish National Podiatrist Registry |
| Fasting C-peptide | Based on the blood sample collected at DD2 enrollment. |  | DD2 |
| Fasting glucose | Based on the blood sample collected at DD2 enrollment. |  | DD2 |
| MBL | Based on the blood sample collected at DD2 enrollment. |  | DD2 |
| HS-CRP | Based on the blood sample collected at DD2 enrollment. |  | DD2 |
| GAD | Based on the blood sample collected at DD2 enrollment. |  | DD2 |
| Adiponectin | Based on the blood sample collected at DD2 enrollment. |  | DD2 |
| ANG-LIKE4 | Based on the blood sample collected at DD2 enrollment. |  | DD2 |
| CD163 | Based on the blood sample collected at DD2 enrollment. |  | DD2 |
| FGF-21 | Based on the blood sample collected at DD2 enrollment. |  | DD2 |
| Follistatin | Based on the blood sample collected at DD2 enrollment. |  | DD2 |
| GDF-15 | Based on the blood sample collected at DD2 enrollment. |  | DD2 |
| Galectin-3 | Based on the blood sample collected at DD2 enrollment. |  | DD2 |
| FGF-23 | Based on the blood sample collected at DD2 enrollment. |  | DD2 |
| IL-6 | Based on the blood sample collected at DD2 enrollment. |  | DD2 |
| IL-1RA | Based on the blood sample collected at DD2 enrollment. |  | DD2 |
| Leptin | Based on the blood sample collected at DD2 enrollment. |  | DD2 |
| MPO | Based on the blood sample collected at DD2 enrollment. |  | DD2 |
| NT-proBNP | Based on the blood sample collected at DD2 enrollment. |  | DD2 |
| Osteocalcin-1 | Based on the blood sample collected at DD2 enrollment. |  | DD2 |
| Osteopontin | Based on the blood sample collected at DD2 enrollment. |  | DD2 |
| RAGE | Based on the blood sample collected at DD2 enrollment. |  | DD2 |
| Resistin | Based on the blood sample collected at DD2 enrollment. |  | DD2 |
| Sclerostin | Based on the blood sample collected at DD2 enrollment. |  | DD2 |
| Serpin | Based on the blood sample collected at DD2 enrollment. |  | DD2 |
| TNF-alfa | Based on the blood sample collected at DD2 enrollment. |  | DD2 |
| U-PAR | Based on the blood sample collected at DD2 enrollment. |  | DD2 |
| YKL-40 | Based on the blood sample collected at DD2 enrollment. |  | DD2 |

**Supplementary Table 2.** Hospital diagnosis codes and definitions of comorbidities recorded in the Danish National Patient Registry.

| **Comorbidity** | **Definition** | **Codes** |
| --- | --- | --- |
| Any macrovascular complications | Any registration of a primary or secondary diagnosis code or a hospital-based procedure code recorded within 10 years before DD2 enrollment. Inpatient, outpatient, and emergency hospital contacts were used to identify diagnosis codes. | ICD-10 and NOMESCO surgery codes:  **Ischemic heart disease:**  Ischemic heart disease: DI21, DI23, DI24, DT822A  Acute ischemic heart disease with/without complications: DT823  Angina pectoris: DI20  Chronic ischemic heart disease DI25  Coronary bypass or percutaneous coronary intervention: KFNA, KFNB, KFNC, KFND, KFNE, KFNF, KFNG, KFNH, KFNW, KFLF  **Heart failure:**  Heart failure: DI50, DI110, DI130, DI132, DI420, DI426, DI427, DI428, DI429  **Stroke:**  Cerebral bleeding: DI61  Cerebrovascular infarct: DI63, DI64, DI65, DI66  Transient cerebrovascular disease: DG45  Unspecified cerebrovascular disease: DI672, DI678, DI679  Previous cerebrovascular disease: DI691, DI693, DI694, DI698  Cerebral thrombolysis or thromboendarterectomy: KAAL10, KAAL11  **Peripheral vascular disease:**  Diabetes with peripheral vascular complications: DE105, DE115, DE125, DE135, DE145  Peripheral/abdominal vascular disease: DI70, DI739, DI74, DN280, DK550, DK551, DH340, DH341, DH342  Vascular surgery: KNBQ, KNCQ, KNDQ, KNEQ, KNFQ, KNGQ, KNHQ, KPAE, KPAF, KPAH, KPAN, KPAP, KPAQ, KPAW99, KPAU74, KPBE, KPBF, KPBH, KPBN, KPBP, KPBQ, KPBW, KPGH10, KPCE, KPCF, KPCH, KPCN, KPCP, KPCQ, KPCW99, KPCW20, KPCU74, KPCU82, KPCU83, KPCU84, KPGE, KPGF, KPGH, KPGN, KPGP, KPGQ, KPGW99, KPGW20, KPDE, KPEE, KPEF, KPEH, KPEN, KPEP, KPEQ, KPEW, KPFE, KPFH, KPFN, KPFP, KPFQ, KPFW, KPGH20, KPGH21, KPGH22, KPGH23, KPGH30, KPGH31, KPGH40, KPGH99, KPDF, KPDH, KPDN, KPDP, KPDW, KPDU74, KPDU82, KPDU83, KPDU84, KPEU74, KPEU82, KPEU83, KPEU84, KPFU74, KPFU82, KPFU83, KPFU84, KPGU74, KPGU83, KPGU84, KPGU99 |
| Kidney disease | Any registration of a primary or secondary diagnosis code or a hospital-based procedure code recorded within 10 years before DD2 enrollment. Inpatient, outpatient, and emergency hospital contacts were used to identify diagnosis codes. | ICD-10 and NOMESCO surgical codes:  Acute kidney injury: DN17  Chronic kidney disease, CKD: DN18  Kidney injury, unspecified: DN19  Diabetes with renal complications: DE102, DE112, DE132, DE142  Glomerular disorders in diabetes mellitus: DN083  Chronic dialysis: BJFD, DZ992  Proteinuria monosymptomatica: DR809  Proteinuria: DN06  Kidney transplantation: KKAS00-KKAS20  Renal failure, pregnancy-related: DO084  Hypertensive renal disease with renal failure: DI120, DI131, DI132 |
| Eye disease | Any registration of a primary or secondary diagnosis code or a hospital-based procedure code recorded within 10 years before DD2 enrollment. Inpatient, outpatient, and emergency hospital contacts were used to identify diagnosis codes. | ICD-10 and NOMESCO surgical codes:  Diabetic retinopathy/maculopathy: DH360  Diabetes with eye complications: DE103, DE113, DE123, DE133, DE143,  Laser treatment: KCKC10, KCKC15  Vitrectomy: KCKD65  Anti-VEGF treatment: KCKD05B  Diabetic cataract: DH280  Traction detachment of retina: DH334  Blindness or severe visual impairment: DH540, DH541, DH544, DH545  Cataract (without other specific cause): DH25, DH268, DH269,  Traction detachment, vitreous hemorrhage, vitreous prolapsus (without other specific cause) DH430, DH431, DH438C, DH439, DH332, DH330, DH335, DH450 |
| Neuropathy | Any registration of a primary or secondary diagnosis code or a hospital-based procedure code recorded within 10 years before DD2 enrollment. Inpatient, outpatient, and emergency hospital contacts were used to identify diagnosis codes. | ICD-10 and NOMESCO surgical codes:  Diabetes with neurological complications: DE104, DE114, DE124, DE134, DE144  Any mononeuropathy: DG56, DG57, DG58, DG59  Any polyneuropathy: DG603, DG609, DG618, DG619, DG620, DG621, DG622, DG628,  DG629, DG63, DG99  Autonomic neuropathy, idiopathic: DG900 |
| Any microvascular disease | Any registration of a primary or secondary diagnosis code recorded within 10 years before DD2 enrollment. Inpatient, outpatient, and emergency hospital contacts were used to identify diagnosis codes. | ICD-10, NOMESCO surgical, and treatment codes from *diabetes and kidney disease, diabetes and eye disease, and diabetes and neuropathy.* |
| Chronic kidney disease (laboratory defined) | Defined using creatine values to calculate the estimated glomerulus filtration rate (eGFR). Chronic kidney disease was defined as eGFR values below 60 ml/min/1.73 m2 or albumin-creatinine ratio above 30 mg/g. Information was assessed from the Laboratory Results for Research and the DDDA; NPU codes for creatinine as well as algorithms for calculating eGFR are provided below. The measurement on the day closest to DD2 enrollment (maximum 6 months after enrollment) was used. |  |
| Cancer excluding non-melanoma skin cancer | Any registration of a primary or secondary diagnosis code recorded within 10 years before DD2 enrollment. Inpatient, outpatient, and emergency hospital contacts were used to identify diagnosis codes. | ICD-10: DC00-DC99 (excl. DC44) |
| Alcohol abuse | Any registration of a primary or secondary diagnosis code recorded within 10 years before DD2 enrollment. Inpatient, outpatient, and emergency hospital contacts were used to identify diagnosis codes. | ICD-10 diagnosis codes: DF102-DF109, DG312, DG621, DG721, DK292, DK70  DK860, DZ721, DE244, DE529A, DK852, DL278A, DZ502, DZ714 Treatment code: BRHE2 |
| Carlson Comorbidity Index | Any registration of a primary or secondary diagnosis code recorded within 10 years before DD2 enrollment.15 Inpatient, outpatient, and emergency hospital contacts were used to identify diagnosis codes. | Codes for calculating the Charlson Comorbidity Index score were found in: Charlson ME, Pompei P, Ales KL, MacKenzie CR. A new method of classifying prognostic comorbidity in longitudinal studies: development and validation. *J Chronic Dis* 1987; 40(5): 373-83.  Patients were categorized by individual scores, as follows:   - 0 points - 1–2 points - 3+ points |

**Supplementary Table 3.** ATC codes and definitions for medication use in the Danish National Prescription Registry.

| **Drug** | **Definition** | **ATC codes** |
| --- | --- | --- |
| Statins | A redeemed prescription within one year before DD2 enrollment | C10AA, C10BA, C10BX |
| Loop diuretics | A redeemed prescription within one year before DD2 enrollment | C03EB, C03C |
| Angiotensin-converting enzyme inhibitors and angiotensin receptor blockers | A redeemed prescription within one year before DD2 enrollment | C09 |
| Ca antagonists | A redeemed prescription within one year before DD2 enrollment | C08 |
| Beta blockers | A redeemed prescription within one year before DD2 enrollment | C07 |
| α-adrenergic antihypertensive agents | A redeemed prescription within one year before DD2 enrollment | C02A, C02B, C02C |
| Thiazides | A redeemed prescription within one year before DD2 enrollment | C03A, C03EA |
| Potassium-sparing agents | A redeemed prescription within one year before DD2 enrollment | C03D, C03E |
| Antihypertensive agents | A redeemed prescription within one year before DD2 enrollment | A prescription for either *Ca antagonists, beta blockers, α-adrenergic antihypertensive agents, thiazides, potassium-sparing agents, or angiotensin-converting enzyme inhibitors/angiotensin receptor II blockers* |
| Platelet aggregation inhibitors (aspirin and other platelet aggregation inhibitors) | A redeemed prescription within one year before DD2 enrollment | B01AC06, N02BA01, N02BA51, B01AC04, B01AC22, B01AC07, B01AC24, B01AC25 |
| Antithrombotic agents (vitamin K antagonists, DOAC, and heparins) | A redeemed prescription within one year before DD2 enrollment | B01AA03, B01AA04, B01AE07, B01AF01, B01AF02, B01AF03, B01AX05, B01AB04, B01AB10, B01AB05, B01AB01 |
| Corticosteroids | A redeemed prescription within one year before DD2 enrollment | H02AB, M01BA, A07EA |
| Antidepressants | A redeemed prescription within one year before DD2 enrollment | N06A |
| Antipsychotic agents | A redeemed prescription within one year before DD2 enrollment | N05A (excluding N05AN01) |
| Opioids | A redeemed prescription within one year before DD2 enrollment | N02AA01, N02AA03, N02AA04, N02AA05, N02AA55, N02AB02, N02AB03, N02AE01, N02AG02, N02AJ06, N02AX02, N02AX06, N07BC02, R05DA04 |

**Supplementary Table 4.** ATC codes and definitions for use of glucose-lowering drugs in the Danish National Prescription Registry.

| **Glucose-lowering treatment** | **Combination** | **ATC codes** |
| --- | --- | --- |
| Glucose-lowering drug | All | A10 |
| Insulin | Monotherapy | A10A (excluding A10AE54, A10AE56) |
| Combination therapy | A10AE54, A10AE56 |
| Metformin | Monotherapy | A10BA02 |
| Combination therapy | A10BD01, A10BD02, A10BD03, A10BD05, A10BD07, A10BD08, A10BD10, A10BD11, A10BD13, A10BD14, A10BD15, A10BD16, A10BD17, A10BD18, A10BD20, A10BD22, A10BD23, A10BD25, A10BD26, A10BD27 |
| Sulfonylurea | Monotherapy | A10BB |
| In combination with metformin only | A10BD01, A10BD02 |
| Other combinations | A10BD04, A10BD06 |
| SGLT-2 inhibitors | Monotherapy | A10BK |
| In combination with metformin only | A10BD15, A10BD16, A10BD20, A10BD23 |
| Other combinations | A10BD19, A10BD21, A10BD24, A10BD25, A10BD27 |
| GLP-1 agonists | Monotherapy | A10BJ |
| Combinations | A10AE54, A10AE56 |
| DPP-4 inhibitors | Monotherapy | A10BH |
| In combination with metformin only | A10BD07, A10BD08, A10BD10, A10BD11, A10BD13, A10BD18, A10BD22 |
| Other combinations | A10BD09, A10BD12, A10BD19, A10BD21, A10BD24, A10BD25, A10BD27 |

The look-back period for use of glucose-lowering drug medication was one year.

**Supplementary Table 5.** NPU codes used to identify laboratory tests in the Nationwide Register of Laboratory Results for Research.

| **Laboratory test** | **NPU codes** | **Database/registry** |
| --- | --- | --- |
| HbA1c | NPU codes: NPU27300, NPU03835  Measurements were recorded in either mmol/mol or percentages. Results in percentages were converted to mmol/mol using the following equation: (HbA1c (%) × 10 × 10.93)-23.5). Results were rounded to the nearest integer. Measurements <18 mmol/mol or >160 mmol/mol were excluded, in accordance with the measurement range for most laboratories in Denmark (analysefortegnelsen.dk). The measurement on the day closest to DD2 enrollment (maximum 6 months after enrollment) was used.  For the most recent HbA1c level before glucose-lowering drug treatment, only measurements prior to treatment initiation were included. | Laboratory Results for Research, DDDA |
| Triglycerides | NPU codes: NPU03620, NPU04094  Measurements were recorded in mmol/L. Measurements ≤0 were excluded.  The measurement on the day closest to DD2 enrollment (maximum 6 months after enrollment) was used. | Laboratory Results for Research, DDDA |
| Creatinine | NPU codes: NPU01807, NPU04998, NPU18016, NPU09101, NPU17559  The measurement on the day closest to DD2 enrollment (maximum 6 months after enrollment) was used. | Laboratory Results for Research, DDDA |
| eGFR | The estimated glomerulus filtration rate (eGFR) was based on creatinine measurements and calculated using an algorithm recommended by the KDIGO (“Clinical Practice Guideline for the Evaluation and Management of Chronic Kidney Disease”. *Kidney International Supplements* (2013) 3, viii, January 2013):   - If female with creatinine ≤ 62 µM: 144 x (P-crea/(0,7 x 88,4))^(-0,329) x 0,993^age - If female with creatinine > 62 µM: 144 x (P- crea/(0,7 x 88,4))^(-1,209) x 0,993^age - If male with creatinine ≤ 80 µM: 141 x (P- crea/(0,9 x 88,4))^(-0,411) x 0,993^age - If male with creatinine > 80 µM: 141 x (P- crea/(0,9 x 88,4))^(-1,209) x 0,993^age |  |
| Albumin-creatine ratio | NPU codes: DNK05289, NPU03918, NPU19661, NPU28842  The measurement on the day closest to DD2 enrollment (maximum 6 months after enrollment) was used. | Laboratory Results for Research, DDDA |
| Total cholesterol | NPU codes: NPU01566  Measurements were recorded in mmol/L.  The measurement on the day closest to DD2 enrollment (maximum 6 months after enrollment) was used. | Laboratory Results for Research, DDDA |
| LDL cholesterol | NPU codes: NPU01568, NPU10171  Measurements were recorded in mmol/L. Hospital laboratories use the Friedewald equation to estimate LDL cholesterol. This estimation is not possible if triglycerides are >4.0 mmol/L and may explain the increased missingness for these values for elevated triglyceride levels. Biologically implausible values were excluded (<0.2 mmol/L). The measurement on the day closest to DD2 enrollment (maximum 6 months after enrollment) was used. | Laboratory Results for Research, DDDA |
| HDL cholesterol | NPU codes: NPU01567, NPU10157, NPU18107  Measurements were recorded in mmol/L. We excluded values ≤0.1 mmol/L. The measurement on the day closest to DD2 enrollment (maximum 6 months after enrollment) was used. | Laboratory Results for Research, DDDA |

**Supplementary Table 6**. Hospital diagnosis codes and definitions of outcomes in the Danish National Patient Registry.

| **Outcome** | **Definition** | **Code** |
| --- | --- | --- |
| All-cause mortality | From DD2 enrollment until May 31, 2023 | Status code “90” in the Civil Registration System |
| Cardiovascular disease | From DD2 enrollment until May 31, 2023 | ICD-10 and NOMESCO surgery codes:  Acute myocardial infarction: DI21  Unstable angina pectoris: DI200  Coronary bypass or percutaneous coronary intervention: KFNA, KFNB, KFNC, KFND, KFNE, KFNF, KFNG, KFNH, KFNW, KFLF  Heart failure: DI50, DI110, DI130, DI132  Cerebral bleeding: DI61  Cerebrovascular infarct: DI63, DI64  Cerebral thrombolysis or thromboendarterectomy: KAAL10, KAAL11 |

**Supplementary Table 7.** Proportion of missingness for selected variables.

| **Variable** | **Non-missing (number, %)** | **Missing (number, %)** |
| --- | --- | --- |
| T2D in immediate family | 11,369 (100%) | 0 (0.0%) |
| Weight | 8,587 (75.5%) | 2,782 (24.5%) |
| Height | 7,584 (66.7%) | 3,785 (33.3%) |
| Body mass index | 7,803 (68.6%) | 3,566 (31.4%) |
| Hip circumference | 10,994 (96.7%) | 375 (3.3%) |
| Waist circumference | 11,001 (96.8%) | 368 (3.2%) |
| Waist-hip ratio | 10,989 (96.7%) | 380 (3.3%) |
| Weight at 20 years | 9,472 (83.3%) | 1,897 (16.7%) |
| Maximum lifetime weight | 11,067 (97.3%) | 302 (2.7%) |
| Resting heart rate | 11,033 (97.0%) | 336 (3.0%) |
| Alcohol consumption | 11,296 (99.4%) | 73 (0.6%) |
| Smoking status | 8,137 (90.0%) | 902 (10.0%) |
| Days per week with >30 minutes of physical activity | 11,319 (99.6%) | 50 (0.4%) |
| Engagement in leisure-time sport activities | 11,311 (99.5%) | 58 (0.5%) |
| Level of physical activity during the past year | 11,319 (99.6%) | 50 (0.4%) |
| Civil status | 11,076 (97.4%) | 293 (2.6%) |
| Education | 10,020 (88%) | 1,349 (12%) |
| Weight | 8,587 (75.5%) | 2,782 (24.5%) |
| Height | 7,584 (66.7%) | 3,785 (33.3%) |
| Body mass index | 7,803 (68.6%) | 3,566 (31.4%) |
| Diabetes duration, years | 11,369 (100.0%) | 0 (0.0%) |
| Systolic blood pressure | 6,081 (67.3%) | 2,958 (32.7%) |
| Diastolic blood pressure | 6,081 (67.3%) | 2,958 (32.7%) |
| **DD2 biobank*** | | |
| Fasting C-peptide | 7,776 (68.4%) | 3,593 (31.6%) |
| Fasting glucose | 7,767 (68.3%) | 3,602 (31.7%) |
| MBL | 7,287 (64.1%) | 4,082 (35.9%) |
| HS-CRP | 9,663 (85.0%) | 1,706 (15.0%) |
| GAD | 5,756 (50.6%) | 5,613 (49.4%) |
| Adiponectin | 9,015 (79.3%) | 2,354 (20.7%) |
| ANG-LIKE4 | 8,707 (76.6%) | 2,662 (23.4%) |
| CD163 | 9,021 (79.3%) | 2,348 (20.7%) |
| FGF-21 | 8,707 (76.6%) | 2,662 (23.4%) |
| Follistatin | 9,176 (80.7%) | 2,193 (19.3%) |
| GDF-15 | 9,020 (79.3%) | 2,349 (20.7%) |
| Galectin-3 | 8,982 (79.0%) | 2,387 (21.0%) |
| FGF-23 | 8,707 (76.6%) | 2,662 (23.4%) |
| IL-6 | 9,169 (80.6%) | 2,200 (19.4%) |
| IL-1RA | 8,707 (76.6%) | 2,662 (23.4%) |
| Leptin | 8,704 (76.6%) | 2,665 (23.4%) |
| MPO | 9,178 (80.7%) | 2,191 (19.3%) |
| NT-proBNP | 9,015 (79.3%) | 2,354 (20.7%) |
| Osteocalcin-1 | 9,177 (80.7%) | 2,192 (19.3%) |
| Osteopontin | 9,176 (80.7%) | 2,193 (19.3%) |
| RAGE | 8,707 (76.6%) | 2,662 (23.4%) |
| Resistin | 9,020 (79.3%) | 2,349 (20.7%) |
| Sclerostin | 8,707 (76.6%) | 2,662 (23.4%) |
| Serpin | 9,021 (79.3%) | 2,348 (20.7%) |
| TNF-alpha | 9,177 (80.7%) | 2,192 (19.3%) |
| U-PAR | 8,707 (76.6%) | 2,662 (23.4%) |
| YKL-40 | 9,019 (79.3%) | 2,350 (20.7%) |
| **Biomarkers used in routine clinical care**** | | |
| Albumin creatinine ratio | 8,786 (77.3%) | 2,583 (22.7%) |
| eGFR | 9,808 (86.3%) | 1,561 (13.7%) |
| HbA1c | 10,444 (91.9%) | 925 (8.1%) |
| HbA1c before glucose-lowering drug use | 7,184 (63.2%) | 4,185 (36.8%) |
| LDL cholesterol | 9,672 (85.1%) | 1,697 (14.9%) |
| HDL cholesterol | 9,372 (82.4%) | 1,997 (17.6%) |
| Total cholesterol | 9,362 (82.3%) | 2,007 (17.7%) |
| Triglycerides | 9,839 (86.5%) | 1,530 (13.5%) |
| **Data from external registries*** | | |
| Individuals with data available in the podiatrist database | 6,732 (59.2%) | 4,637 (40.8%) |
| Individuals with available DDDA data | 9,039 (79.5%) | 2,330 (20.5%) |
| Individuals with available birth-related data in the National Archive (birthweight) | 9,531 (83.8%) | 1,838 (16.2%) |

Definitions of covariates are provided in Supplementary Tables 2–7.

*Completeness and availability of variables may depend on the research studies generating the analysis results at specific time points.

**Available in routine care registries before/at date of cohort enrolment, unless otherwise stated

**Missing data**

The amount of missingness for lifestyle behaviors and body composition ranged from 0.4% (for questions addressing physical activity) to 31.4% (for BMI) (Supplementary Table 8). The proportion of missing data before/at enrolment for biomarkers used in routine clinical care ranged from 8.1% (for HbA1c values) to 22.7% (for urine albumin-creatinine ratio). The biobank contains a total of 10,796 participants with blood tests, representing 95% of the total DD2 cohort. Among these, 8,778 participants had fasting blood tests, accounting for 77.9% of the total DD2 cohort. The proportion of missing data for the selected biomarkers analyzed from DD2 blood samples depends on the time point when the latest biomarker analysis was conducted. Numerous biomarkers were measured in a major analysis round in 2022 (for the cohort enrolled between 2010-2021), and are therefore missing for around 20% of the total cohort by 2023, i.e. missing among the newest cohort members.

**Supplementary Table 8.** Incidencerates and risks of mortality and cardiovascular outcomes in individuals after DD2 enrollment.

| **Outcome** | **Number included at baseline** | **Events** | **Incidence rates per 1,000 person-years (95% CI)** | **1-year risk (95% CI)** | **5-year risk (95% CI)** | **10-year risk (95% CI)** |
| --- | --- | --- | --- | --- | --- | --- |
| **All-cause mortality** | 11,369 | 1,368 | 17.6 (16.7–18.5) | 0.9 (0.7–1.0) | 5.8 (5.3–6.3) | 16.1 (15.2–17.0) |
| **Cardiovascular outcomes** | 9,572 | 870 | 13.8 (12.9–14.8) | 1.1 (0.9–1.3) | 5.7 (5.2–6.3) | 12.3 (11.5–13.2) |

Incident cardiovascular outcomes included acute myocardial infarction, unstable angina, heart failure, coronary artery bypass graft/percutaneous coronary intervention procedures, stroke, and cerebral thrombolysis/thrombectomy procedures. Patients were excluded from the analysis of cardiovascular disease if they had a preexisting hospital diagnosis or procedure code before baseline (N=1,797). Individuals were followed up starting at DD2 enrollment. The Kaplan-Meier estimator was used to calculate all-cause mortality, and the Aalen-Johansen estimator was used to calculate risk of cardiovascular disease, taking the competing risk of death into account.

**References**

1. McCarthy S, Das S, Kretzschmar W, et al. A reference panel of 64,976 haplotypes for genotype imputation. *Nat Genet*. 2016;48(10):1279-83.

2. Auton A, Brooks LD, Durbin RM, et al. A global reference for human genetic variation. *Nature*. 2015;526(7571):68-74.

3. Das S, Forer L, Schönherr S, et al. Next-generation genotype imputation service and methods. *Nature Genetics*. 2016;48(10):1284-1287.

4. Loh P-R, Danecek P, Palamara PF, et al. Reference-based phasing using the Haplotype Reference Consortium panel. *Nature Genetics*. 2016;48(11):1443-1448.

5. Christensen DH, Knudsen ST, Gylfadottir SS, et al. Metabolic Factors, Lifestyle Habits, and Possible Polyneuropathy in Early Type 2 Diabetes: A Nationwide Study of 5,249 Patients in the Danish Centre for Strategic Research in Type 2 Diabetes (DD2) Cohort. *Diabetes Care*. 2020;43(6):1266-1275.

6. Gylfadottir SS, Itani M, Krøigård T, et al. Diagnosis and prevalence of diabetic polyneuropathy: a cross-sectional study of Danish patients with type 2 diabetes. *Eur J Neurol*. 2020;27(12):2575-2585.

7. Gylfadottir SS, Weeracharoenkul D, Andersen ST, Niruthisard S, Suwanwalaikorn S, Jensen TS. Painful and non-painful diabetic polyneuropathy: Clinical characteristics and diagnostic issues. *J Diabetes Investig*. 2019;10(5):1148-1157.

8. Gylfadottir SS, Christensen DH, Nicolaisen SK, et al. Diabetic polyneuropathy and pain, prevalence, and patient characteristics: a cross-sectional questionnaire study of 5,514 patients with recently diagnosed type 2 diabetes. *Pain*. 2019;161(3):574-583.

9. Ried-Larsen M, Thomsen RW, Berencsi K, et al. Implementation of interval walking training in patients with type 2 diabetes in Denmark: rationale, design, and baseline characteristics. *Clin Epidemiol*. 2016;8:201-9.

10. Thorsen IK, Yang Y, Valentiner LS, et al. The Effects of a Lifestyle Intervention Supported by the InterWalk Smartphone App on Increasing Physical Activity Among Persons With Type 2 Diabetes: Parallel-Group, Randomized Trial. *JMIR Mhealth Uhealth*. 2022;10(9):e30602.

11. Valentiner LS, Thorsen IK, Kongstad MB, et al. Effect of ecological momentary assessment, goal-setting and personalized phone-calls on adherence to interval walking training using the InterWalk application among patients with type 2 diabetes-A pilot randomized controlled trial. *PLoS One*. 2019;14(1):e0208181.

12. Stidsen JV, Nielsen JS, Henriksen JE, et al. Protocol for the specialist supervised individualised multifactorial treatment of new clinically diagnosed type 2 diabetes in general practice (IDA): a prospective controlled multicentre open-label intervention study. *BMJ Open*. 2017;7(12):e017493.

13. Domazet SL, Tarp J, Thomsen RW, et al. Accelerometer-derived physical activity and sedentary behaviors in individuals with newly diagnosed type 2 diabetes: A cross-sectional study from the Danish nationwide DD2 cohort. *Front Sports Act Living*. 2023;4:1089579.

14. Jakobsen PR, Christensen JR, Nielsen JB, et al. Identification of Important Factors Affecting Use of Digital Individualised Coaching and Treatment of Type 2 Diabetes in General Practice: A Qualitative Feasibility Study. *Int J Environ Res Public Health*. 2021;18(8):3924.

15. Charlson ME, Pompei P, Ales KL, MacKenzie CR. A new method of classifying prognostic comorbidity in longitudinal studies: development and validation. *J Chronic Dis*. 1987;40(5):373-83.
